# Supplementary material for: Withaferin a Attenuates Retinal Ischemia-Reperfusion Injury via Akt-Dependent Inhibition of Oxidative Stress
Source: MDPI journal article supplement (doi:10.3390/cells11193113), 2022-10-02
Supplement: s1 [file s1]

**Table S1:** Real-time PCR primers

| Genes                   | Forward Primer (5'-3')      | Reverse Primer (5'-3')   |
|-------------------------|-----------------------------|--------------------------|
| HMOX1                   | AAGACTGCGTTCCTGCTCAAC       | AAAGCCCTACAGCAACTGTCTG   |
| HSPA1A                  | CGGGGTACCGCCTTTCAGGTTACAATC | CCCAAGCTTCAATCAGCCGCTTCG |
| HSPA1B                  | TTTGAGGGCATCGACTTCTACA      | CCAGGACCAGGTCGTGAATC     |
| OSGIN1                  | CCCGGTCATCATTGTGGGTAA       | GCTTCGTGTAGGGTGTGTAGC    |
| DNAJB1                  | AAGGCATGGACATTGATGACC       | GGCCAAAGTTCACGTTGGT      |
| CLCF1                   | TTTCAACGAGCCAGACTTCAAC      | GAGGCCACGCAAGTAACACA     |
| DNAJA4                  | GGGATGTTTATGACCAAGGCG       | GCCAATTTCTTCGTGACTCCA    |
| ADAMTS4                 | GAGGAGGAGATCGTGTTCCTCA      | CCAGCTCTAGTAGCAGCGTC     |
| PRDX1                   | CCACGGAGATCATTGCTTTCA       | AGGTGTATTGACCCATGCTAGAT  |
| TXNRD1                  | ATATGGCAAGAAGGTGATGGTCC     | GGGCTTGCCTAACAAGCTG      |
| IFNE                    | GGCCTCTACCACTATCTTCTCTC     | ACACTGCTGAATTGACAAGGTTT  |
| LDLR                    | TCTGCAACATGGCTAGAGACT       | TCCAAGCATTCGTTGGTCCC     |
| Actb ( $\beta$ - actin) | CATGTACGTTGCTATCCAGGC       | CTCCTTAATGTCACGCACGAT    |
